# Supplementary material
Source: MDPI journal article supplement (https://www.mdpi.com/2304-6740/7/10/123)
Supplement: s1 [file s1]

# Supplementary Materials: Post Synthetic Defect Engineering of UiO-66 Metal–Organic Framework with An Iridium(III)-HEDTA Complex and Application in Water Oxidation Catalysis

Giordano Gatto, Alceo Macchioni \*, Roberto Bondi, Fabio Marmottini and Ferdinando Costantino \*

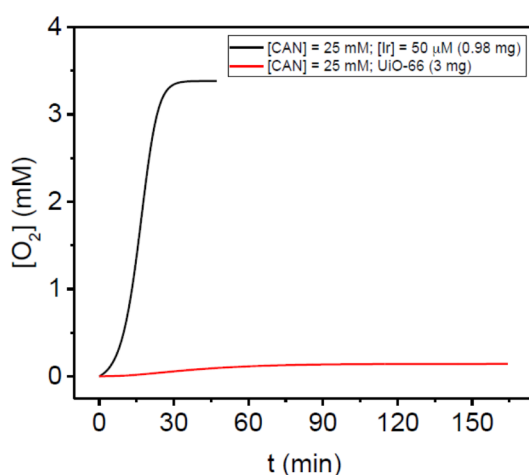

**Figure S1.** Manometric oxygen evolution of IrEDTA@UiO-66 (black line) and UiO-66 (red line).  $[O_2]_{\text{black}} = 3.38 \text{ mM}$   $[O_2]_{\text{red}} = 0.14 \text{ mM}$ .

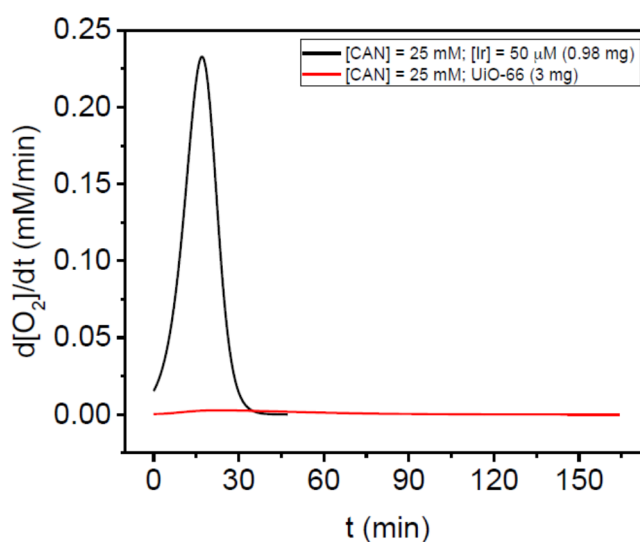

**Figure S2.** Differential manometric oxygen evolution of IrEDTA@UiO-66 (black line) and UiO-66 (red line).  $V_{\text{max}} (\text{black}) = 0.23 \text{ mM} \cdot \text{min}^{-1}$ ,  $V_{\text{max}} (\text{red}) = 0.003 \text{ mM} \cdot \text{min}^{-1}$ .

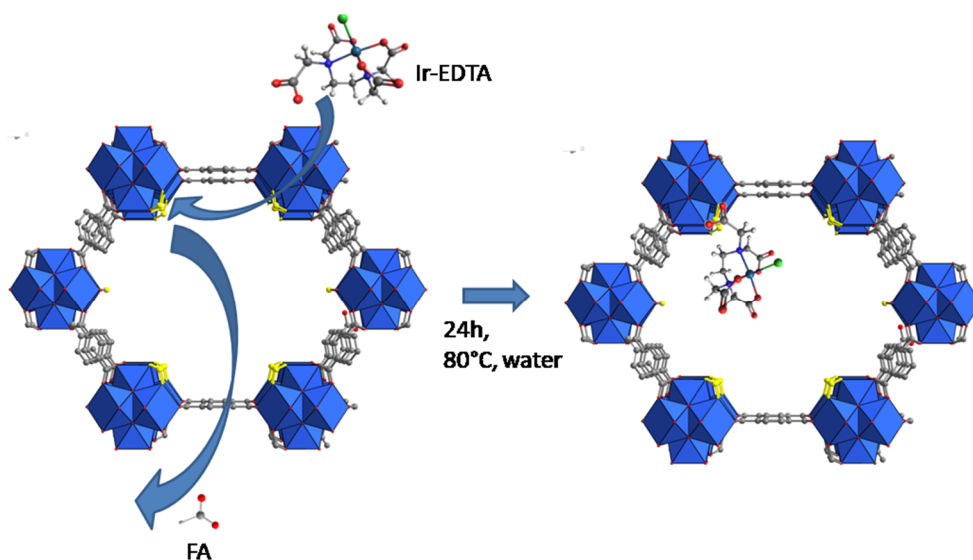

**Figure S3.** PSDE of FA with IrEDTA complex onto the structure of FA\_UiO-66.

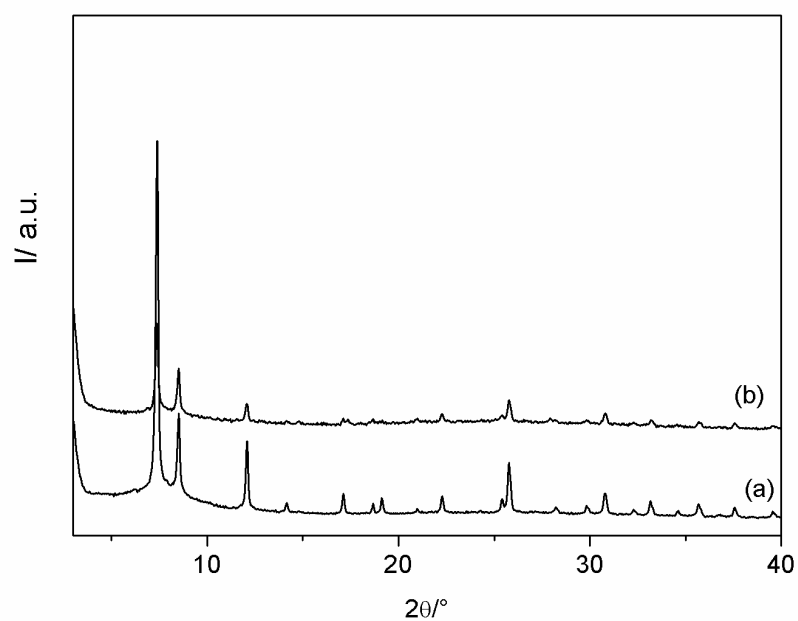

**Figure S4.** XRPD patterns of IrEDTA@UiO-66(3) before (a) and after (b) three catalytic runs.

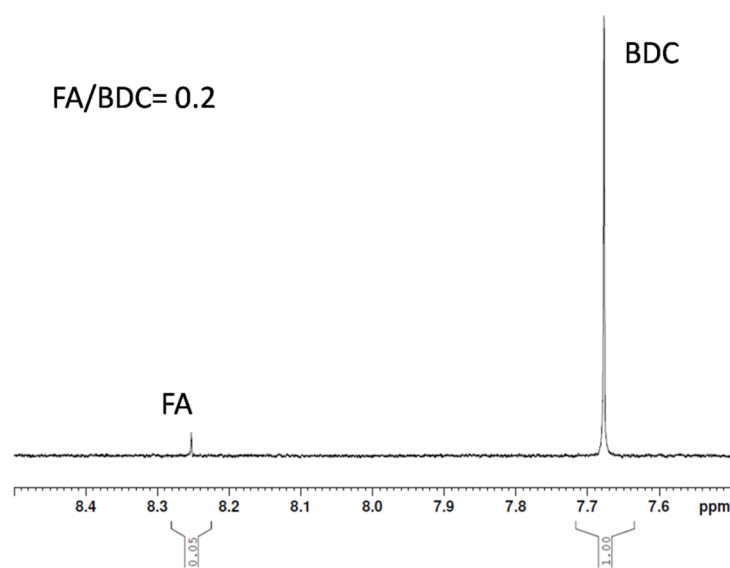

**Figure S5.**  $^1\text{H}$ -NMR spectrum of IrEDTA@UiO-66 after 3 catalytic runs.
